1     **Neural dysfunction correlates with heat coma and CT<sub>max</sub> in *Drosophila* but does not set the**  
2                                   **boundaries for heat stress survival**

3

4                                   *Lisa B. Jørgensen<sup>1\*</sup>, R. Meldrum Robertson<sup>2</sup> & Johannes Overgaard<sup>1</sup>*

5

6     <sup>1</sup>*Zoophysiology, Department of Bioscience, Aarhus University, 8000 Aarhus C, Denmark*

7     <sup>2</sup>*Department of Biology, Queen's University, Kingston, ON, K7L 3N6, Canada*

8     \*Author for correspondence ([lbj@bios.au.dk](mailto:lbj@bios.au.dk)) (LBJ)

9

10

11    **Keywords:** CNS, heat stress, heat death, spreading depolarisation, heat sensitivity, hyperthermia

12    **Running title:** Neural dysfunction in heat stress

13

14 **Summary statement**

15 Hyperthermic failure of the *Drosophila* central nervous system causes heat coma, a phenotype varying in  
16 temperature between drosophilids, but neural failure is likely not the primary cause of heat mortality.

17 **Abstract**

18 When heated, insects lose coordinated movement followed by the onset of heat coma ( $CT_{max}$ ). These  
19 phenotypes are popular measures to quantify inter- and intraspecific differences in insect heat tolerance, and  
20  $CT_{max}$  correlate well with current species distributions. Here we examined the function of the central nervous  
21 system (CNS) in five species of *Drosophila* with different heat tolerances, while they were exposed to either  
22 constant high temperature or a gradual increasing temperature (ramp). Tolerant species were able to preserve  
23 CNS function at higher temperatures and for longer durations than sensitive species and similar differences  
24 were found for the behavioral indices (loss of coordination and onset of heat coma). Furthermore, the timing  
25 and temperature (constant and ramp exposure, respectively) for loss of coordination or complete coma  
26 coincided with the occurrence of spreading depolarisation (SD) events in the CNS. These SD events disrupt  
27 neurological function and silence the CNS suggesting that CNS failure is the primary cause of impaired  
28 coordination and heat coma. Heat mortality occurs soon after heat coma in insects and to examine if CNS  
29 failure could also be the proximal cause of heat death, we used selective heating of the head (CNS) and  
30 abdomen (visceral tissues). When comparing the temperature causing 50% mortality ( $LT_{50}$ ) of each body  
31 part to that of the whole animal, we found that the head was not particularly heat sensitive compared to the  
32 abdomen. Accordingly, it is unlikely that nervous failure is the principal/proximate cause of heat mortality in  
33 *Drosophila*.

## 34 **Introduction**

35 Thermal tolerance is arguably among the most important traits in defining the biogeographical distribution of  
36 ectothermic species (Addo-Bediako *et al.*, 2000; Sunday *et al.*, 2014). This is also the case for insects  
37 (Gaston & Chown, 1999; Vorhees *et al.*, 2013), including *Drosophila* where tolerance to both low and high  
38 temperature shows a high correlation to the current species distributions (Andersen *et al.*, 2015; Jørgensen *et al.*,  
39 *et al.*, 2019; Kellermann *et al.*, 2012; Kimura, 2004). In the case of insect cold tolerance there is a general  
40 understanding of the processes causing cold coma and cold mortality (Andersen *et al.*, 2018; Bayley *et al.*,  
41 2018; Košťál *et al.*, 2004; MacMillan & Sinclair, 2011), and many physiological adaptations that underlie  
42 differences in cold tolerance between species and populations have been uncovered (Feder & Hofmann,  
43 1999; Overgaard & MacMillan, 2017; Sinclair *et al.*, 2003; Yi & Lee, 2004; Zachariassen, 1985). In contrast,  
44 it is generally less clear which physiological perturbations cause heat coma and heat mortality, and  
45 accordingly there is a poorer understanding of the adaptations that result in intra- and interspecific variations  
46 in insect heat tolerance (but see Bowler (2018) and Neven (2000)).

47 Heat tolerance of insects and other ectotherms is typically measured by recording the onset of characteristic  
48 behaviours (or endpoints) during heat exposure. These measures include the loss of equilibrium or righting  
49 response, onset of spasms, entry into a comatose state or heat mortality (Cowles & Bogert, 1944;  
50 Lutterschmidt & Hutchison, 1997a; Lutterschmidt & Hutchison, 1997b; Terblanche *et al.*, 2011). The term  
51 ‘CT<sub>max</sub>’ (critical thermal maximum) is frequently and indiscriminately used for all of these endpoints  
52 although the different behavioural phenotypes represent the responses to different intensities or durations of  
53 heat stress. Thus, mortality is most often preceded by a progressive loss of motor-control (Friedlander *et al.*,  
54 1976; Gladwell *et al.*, 1975; Lutterschmidt & Hutchison, 1997a) and some of the endpoints, such as heat  
55 coma, can be reversed if the animal is removed from the heat stress immediately after the endpoint is  
56 observed (Fraenkel, 1960; Hamby, 1975; Heath *et al.*, 1971; Martinet *et al.*, 2015; Rodgers *et al.*, 2010, but  
57 see O’Sullivan *et al.*, (2017)). It can be difficult to discriminate the heat coma and heat death (Larsen, 1943;  
58 Mellanby, 1954), as the rate of heat injury accumulation responds strongly to small changes in temperature.  
59 Accordingly, slightly longer exposures to high temperatures than those causing coma can result in the  
60 accumulation of lethal amounts of heat injury (Bigelow, 1921; Jørgensen *et al.*, 2019; Kingsolver &  
61 Umbanhowar, 2018).

62 There are a number of physiological dysfunctions that have been suggested to cause heat coma and heat  
63 mortality in insects. These include a mismatch between demand and supply of oxygen to active tissues  
64 (described in the hypothesis of oxygen and capacity limited thermal tolerance – OCLTT) (Pörtner, 2001),  
65 hemolymph hyperkalaemia which would impair muscle function (Gladwell, 1975; Gladwell *et al.*, 1975;  
66 O’Sullivan *et al.*, 2017), cellular heat injury to the membranes (Bowler, 1981; Bowler, 2018; Bowler *et al.*,  
67 1973; Hazel, 1995) and breakdown of central nervous function (Hamby, 1975; Larsen, 1943; Prosser &

68 Nelson, 1981; Robertson, 2004). The evidence to support acute heat failure or mortality due to oxygen  
69 limitations is not strong for terrestrial insects (Klok, 2004; Mölich *et al.*, 2013; Verberk *et al.*, 2015) and  
70 there is also limited support for hemolymph hyperkalaemia as the proximal cause of heat coma/mortality  
71 (O'Sullivan *et al.*, 2017). Accordingly, the strongest candidate mechanisms underlying heat coma are tied to  
72 breakdown of nervous function. Silencing of nervous function has been observed in heat exposed fruit flies  
73 and locusts where heat stress causes a spreading depolarisation (SD) in the central nervous system (CNS)  
74 (Money *et al.*, 2009; Robertson, 2004; Rodgers *et al.*, 2007). Spreading depolarisation is triggered by failure  
75 to maintain ion gradients between the intra- and extracellular compartments within the CNS, which results in  
76 depolarization of neurons and glial cells and a surge of potassium ions in the extracellular space of the brain,  
77 preventing neural activity (Robertson, 2004; Robertson *et al.* (submitted); Spong *et al.*, 2016). Furthermore,  
78 studies have shown that inter- and intraspecific differences in cold coma are highly correlated with the loss  
79 of CNS function in insects (Andersen *et al.*, 2018; Robertson *et al.*, 2017). Given the similarity in the  
80 behavioural phenotypes of heat and cold coma there is an obvious possibility that the onset of heat coma is  
81 also caused by CNS failure in insects.

82 In most insects, heat mortality follows closely after the onset of heat coma (Mellanby, 1954) and the  
83 hypothesis about hyperthermic loss of CNS function could therefore also be extended to be the proximal  
84 cause of heat mortality. In goldfish, heating either the cerebellum or the water caused similar behavioural  
85 responses, that progressed from hyperactivity to coma (Friedlander *et al.*, 1976). A recent study revisited the  
86 work of Friedlander *et al.*, and here the authors selectively cooled the brain of Atlantic cod while the fish  
87 were subjected to heat stress, and found that this resulted in increased heat tolerance (measured as loss of  
88 equilibrium), compared to controls and instrumented controls (Jutfelt *et al.*, 2019). Accordingly, it appears  
89 that controlling the temperature of the CNS can mimic whole-animal exposure to a specific temperature.

90 In the present study we used a comparative study system of five *Drosophila* species with pronounced  
91 interspecific differences in heat tolerance. The most heat sensitive species goes into coma at a temperature  
92 6°C lower than the most tolerant species in a ramping assay, and similarly the constant temperature estimated  
93 to cause onset of coma after a 1-hour exposure is almost 6°C lower in the sensitive species compared to the  
94 most heat tolerant species used here (Jørgensen *et al.*, 2019). To investigate the relation between neural  
95 dysfunction and the two behavioural heat stress phenotypes, loss of coordinated movement ( $T/t_{\text{back}}$ ) and onset  
96 of heat coma ( $T/t_{\text{coma}}$ ), we measured DC potentials in the central nervous system of the five species during  
97 heat exposure to record spreading depolarisation as an indication of neuronal failure. These experiments  
98 were performed with both gradual heating (a dynamic ramping assay) and constant (static) heat exposure to  
99 constant temperature. The loss of coordinated movement, the onset of heat coma and heat mortality occur in  
100 rapid succession in many insects. To examine if the onset of heat mortality is caused proximately by failure  
101 in the CNS, we designed a simple experiment in which we compare the heat sensitivity of flies that are

102 heated over their entire body with specimens heated specifically in the head (CNS) or abdomen (visceral  
103 tissues). This experiment was performed in three of the *Drosophila* species and was designed to evaluate if  
104 some body sections (head with primarily neuronal tissue vs abdomen with primarily visceral tissue) were  
105 more sensitive to heat stress than others.

## 106 **Materials and methods**

### 107 ***Experimental animals***

108 Five species of *Drosophila* (*D. immigrans*, Sturtevant 1921; *D. subobscura*, Collin 1936; *D. mercatorum*,  
109 Patterson and Wheeler 1942; *D. melanogaster*, Meigen 1830 and *D. mojavensis*, Patterson 1940) were used  
110 in this study. The least heat tolerant species *D. immigrans* can survive 35.4°C for 1 hour while the most  
111 tolerant species *D. mojavensis* can survive 41.2°C for 1 hour (Jørgensen *et al.*, 2019) and collectively these  
112 five species represent a broad range of heat tolerances within *Drosophila*. Flies were reared and maintained  
113 under common garden conditions in 250-mL bottles containing 70 mL of oat-based Leeds medium (see  
114 Andersen *et al.* (2015)) in a 19°C room with constant light. Maintenance bottles with adults that parented the  
115 experimental flies were changed twice a week, and newly eclosed adults from rearing bottles were collected  
116 and transferred to fresh vials with fly medium every 1-3 days. Experimental flies were produced by  
117 transferring a tablespoon of used medium (including eggs) to another 250-mL bottle with 70 mL new  
118 medium. 2-4 days post-eclosion flies were anaesthetised with CO<sub>2</sub>, sexed and female flies were moved to  
119 new medium vials, and allowed to recover from the CO<sub>2</sub> anaesthesia for at least two days before  
120 measurements (MacMillan *et al.*, 2017). All experiments were performed on 4-9 days-old non-virgin female  
121 flies, because of their larger size.

### 122 ***Heat tolerance assays***

123 Behavioural heat tolerance phenotypes were characterised with a ramping and a static assay using the same  
124 setup as previously described in Jørgensen *et al.* (2019). In this setup the fly was exposed to homogenous  
125 heat exposure within a glass vial that was submerged in a water tank with a controlled temperature (Fig. 1A).  
126 In the ramping assay, temperature was increased by 0.25 °C min<sup>-1</sup> from 19 °C. Two behavioural phenotypes  
127 were recorded during this experiment: 1) the temperature at which the fly would lose coordination and fall on  
128 its back ( $T_{\text{back}}$ ) and 2) the temperature at which the fly was completely still ( $T_{\text{coma}}$ ).  $T_{\text{coma}}$  was verified by  
129 poking the vial lids with a stick to agitate the flies and check for reflexes. The static assay used a similar  
130 setup and method to record knockdown, but instead of increasing the temperature gradually, the flies were  
131 placed in the bath pre-set to 38 °C, after which the exposure durations causing loss of coordinated movement  
132 ( $t_{\text{back}}$ ) and heat coma ( $t_{\text{coma}}$ ) were noted (here the lowercase “t” represents time). The “static” assay was only  
133 static for 1 hour at 38 °C after which the temperature was increased by 0.25 °C min<sup>-1</sup> to ensure that more heat

134 tolerant flies would also succumb to heat stress. 7 flies were measured for each species in each assay, except  
135 *D. subobscura* in the ramping assay (n=6).

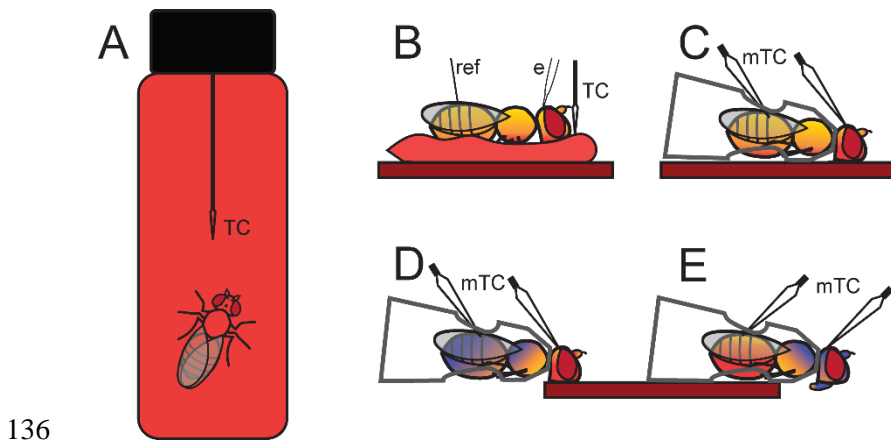

137 Fig. 1 Overview of heating methods used for the experiments. Colour of the fly body indicates the assumed  
138 heat distribution, with red indicating warmer over yellow to blue for colder (eyes are red to characterise  
139 *Drosophila*). Spear-shaped arrows show the placement of thermocouples for each method, normal size (1.5  
140 mm tip) thermocouples are marked with TC, micro thermocouples (25  $\mu$ m tip) with mTC. (A) For  
141 behavioural phenotype assessment the fly was placed in a glass vial which was submerged in a temperature-  
142 controlled water bath. A uniform heat distribution around the fly was expected. (B) To measure spreading  
143 depolarisation the fly was fastened in a bed of wax (lighter red) on top of a Peltier element heating stage  
144 (darker red). The wax bed is assumed to give a relatively uniform heat distribution across the ventral body  
145 surface, but the dorsal side is possibly cooled slightly by the surrounding air. For these experiments,  
146 temperature was measured on top of the wax, adjacent to the head. The placement of the reference (ref) and  
147 measuring electrode (e) is also shown. (C) To assess heat sensitivity following whole-body heat exposure the  
148 fly was tethered inside a pipette tip, which was placed on the heating stage (dark red). The ventral side was  
149 warmer than the dorsal side, and the head tended to be slightly warmer than the abdomen. For these  
150 experiments we measured temperature on the dorsal side of the head and abdomen using micro-  
151 thermocouples. (D) In selective heating of the head, the fly was tethered but here only the head was in  
152 contact with the heating stage. Consequently, the abdomen and thorax were maintained at a lower  
153 temperature. (E) Selective heating of the abdomen resulted in a lower temperature of the thorax and head,  
154 notice that the non-measuring parts of thermocouples are oriented away from the heating plate.

### 155 *Measuring spreading depolarisation*

156 Electrophysiological measurements of DC potentials in the CNS (a proxy for nervous function) were carried  
157 out as described by Andersen *et al.* (2018). Filamented borosilicate glass capillaries (1 mm diameter; 1B100-  
158 F-4, World Precision Instruments, Sarasota, Florida, USA) were pulled to low tip resistance (5-7 M $\Omega$ ) using  
159 a Flaming-Brown PC-84 micro-pipette puller (Sutter Instruments, Novato, CA, USA) and back-filled with  
160 500 mM KCl solution. The glass electrodes were connected to a Duo 773 intracellular differential amplifier  
161 (World Precision Instruments, Sarasota, Florida, USA) using the low impedance channel and probe, and a  
162 chlorinated Ag/AgCl wire was used as reference electrode to ground the preparation. An MP100 data-  
163 acquisition system was used to digitalize the voltage output which was recorded using AcqKnowledge  
164 software (Biopac Systems, Inc., CA, USA).

165 A fly was prepared for measurement by gently fastening its ventral side to a bed of wax on a glass cover  
166 slide. Using a small pair of scissors, a small hole was cut in the abdomen between the second and third-to-  
167 last tergites for placement of the ground electrode. Another cut was made along the head midline just  
168 posterior to the ocelli to insert the glass recording electrode. The cover slide with the fly was placed onto a  
169 Peltier plate pre-set to 30 °C which could be thermoelectrically heated (PE120, Linkam Scientific  
170 Instruments, Tadworth, United Kingdom), and temperature was monitored continuously using a type K  
171 thermocouple (integrated with the MP100 data-acquisition system) placed on top of the wax, adjacent to the  
172 head of the fly (Fig. 1B). This heating method was expected to heat the ventral side of the fly  
173 homogeneously, but also result in a small temperature gradient from the ventral to the dorsal side. The glass  
174 electrode and the reference (Ag/AgCl) electrode were placed in their designated holes using  
175 micromanipulators, and the voltage was zeroed. To test the quality of the preparation, a flow of humidified  
176 N<sub>2</sub> was passed over the fly to elicit an anoxic spreading depolarisation (SD). The single depolarisation  
177 triggered by anoxia, persists throughout the exposure to N<sub>2</sub>, but has been found to be completely reversible in  
178 *Drosophila* (Armstrong et al., 2011; Rodríguez & Robertson, 2012) and locusts (Rodgers *et al.*, 2007), and  
179 additionally we did not find any difference in timing of SD in heating experiments with and without prior  
180 anoxia treatment. We therefore used this anoxia test to discard preparations that failed to depolarise  
181 (suggesting that there was a problem with the electrode placement). This test also gave an indication of the  
182 size of depolarisation that could be expected from that particular preparation as this is also dependent on the  
183 quality of impalement and location of the recording electrode. If the preparation had depolarised  $\geq 20$  mV in  
184 response to anoxia, the voltage was zeroed again, and the preparation was either used for ramping, static or  
185 control experiments.

186 In ramping experiments, the temperature of the thermal stage was increased from 30 °C by 0.25 °C min<sup>-1</sup> and  
187 the temperature (at the half-amplitude of the negative DC shift associated with SD) of the first and last SD  
188 event (SD<sub>first</sub> and SD<sub>last</sub>, respectively) along with the number of SD events was recorded. The ramping  
189 continued until it was clear that no more depolarisations would occur, which was concluded when the  
190 preparation could no longer maintain a stable base line DC potential (see example traces in Fig. 2). In static  
191 heat exposure experiments, temperature was rapidly increased from 30 °C to 38 °C (mean heating time: 73 s,  
192 approx. 6.6 °C min<sup>-1</sup>), and the timing of SD<sub>first</sub> and SD<sub>last</sub> and the number of depolarisation events were noted  
193 as above. The stage was kept at 38 °C until no more depolarisations were anticipated (same criterion as in  
194 ramping experiments). In preparations for which no depolarisations had occurred during the 1-hour exposure  
195 (only in *D. melanogaster* and *D. mojavensis*), the stage temperature was increased by 0.25 °C min<sup>-1</sup> after the  
196 first hour at 38 °C and this heating was continued until depolarisations were measured. Some of the  
197 preparations elicited only a single SD event, and accordingly the temperature/time reported was the same for  
198 SD<sub>last</sub> as SD<sub>first</sub> (see Fig. 2C).

199 A number of pilot studies were conducted to test if the starting condition at 30 °C or the handling of the fly  
200 was stressful enough to elicit SDs by keeping a few *D. immigrans* (the least heat tolerant species) and *D.*  
201 *mojavensis* (the most heat tolerant species) at 30 °C for 1 hour, but these conditions failed to elicit SDs in  
202 either species. These experiments were concluded by increasing temperature by 1 °C min<sup>-1</sup> until SD events  
203 were observed, leading us to conclude that the preparations were responsive but that the handling and  
204 starting conditions (30 °C) alone were unable to evoke this response.

### 205 ***Selective heating of head and abdomen***

206 To further examine the role of nervous function in heat tolerance, we performed a series of experiments in  
207 which we selectively heated the head or the abdomen of flies and compared their survival after 24 hours to  
208 that of flies that had been heated more uniformly (See Fig. 1C-E). The motivation for this study was to  
209 examine if the head (dominated by nervous tissue) was more heat sensitive than the abdomen (dominated by  
210 fat-body and intestinal tissue). Only three species (*D. subobscura*, *D. melanogaster* and *D. mojavensis*) were  
211 used for these experiments as they represent low, medium and high heat tolerance, respectively. *D.*  
212 *subobscura* was chosen to represent low heat tolerance rather than *D. immigrans* due to its smaller size,  
213 which made it more appropriate for the method.

214 For these experiments the flies needed to be restrained in a way that allowed one end of the fly to be  
215 held closer to the heating stage, and as survival was used as the measure of sensitivity, the restraining  
216 method fixation should also allow for the flies to be moved from the heating stage without inflicting injury to  
217 the animals. Accordingly, flies were fastened in 200 µL pipette tips, using a device originally designed for  
218 hemolymph extraction (MacMillan & Hughson, 2014). With a stream of air, the fly was manipulated  
219 headfirst into the pipette tip, and the airflow was blocked once the fly was stuck in the tip (taking care not to  
220 injure it). The pipette tip was removed from the device and the tip was cut off just anterior to the head  
221 followed by two cuts (one from the dorsal and one from the ventral view of the fly) that were made in  
222 roughly a 45° angle towards the anterior part of tip (Fig. 1C-E). These angled cuts allowed better  
223 contact between the head and the heating stage on the ventral side and room for the thermocouple to measure  
224 head temperature on the dorsal side. Using a scalpel, some of the plastic covering the abdomen was gently  
225 “shaved” off, while making sure that no holes were made. The tip was then reattached to the air pressure  
226 device and the fly was “pushed” until the head protruded from the tip. The area that had been thinned before  
227 was now cut away, leaving the abdomen exposed, thereby decreasing the distance to the heating stage on the  
228 ventral side (Fig. 1C-E). Another cut was made in the dorsal side of the tip allowing placement of a micro  
229 thermocouple directly on the dorsal side of the abdomen (here it was often necessary to move the wings to  
230 the side) (Fig. 1C-E). Flies that were injured (other than severed wings) were discarded. The preparations  
231 were used for either whole-body heating, selective heating of the head, selective heating of the abdomen or



232 as un-heated controls. Flies were generally heated on the ventral side, but we also tested some flies exposed  
233 to whole body heating from the dorsal side (see Supplements Fig. S1).

234 For ventral whole-body heating, the pipette tip was placed on the Peltier plate (PE120, Linkam  
235 Scientific Instruments, Tadworth, United Kingdom) with the wide end of the tip at a slightly positive angle,  
236 to facilitate closer contact between the heating stage and the ventral side of the head and abdomen (Fig. 1C).  
237 When the tip was staged, two micro K type Fine thermocouples (tip diameter 25 $\mu$ m, KFG-25-100-100,  
238 ANBE, Genk, Belgium) were placed on the surface of the head and the abdomen, respectively (Fig. 1C).  
239 This method gave a relatively homogenous heating of the fly when measured on the dorsal side, with a  
240 tendency for slightly higher temperatures measured on the head (possibly due to closer contact with Peltier  
241 plate). For every sample, the tip was turned 180° horizontally, such that the head and abdomen switched  
242 location on the heating stage, to minimise any differences in heating across the stage. The transversal  
243 temperature gradient that arose from ventral heating was measured in *D. mojavensis* by gradually moving  
244 thermocouples through head and abdomen from the dorsal towards the ventral side, in flies that had been  
245 killed before the experiment. This transverse difference was recorded at  $2.51 \pm 0.22$  °C and did not differ  
246 between head and abdomen (one sample t-test,  $t=11.05$ ,  $df=11$ ,  $p<0.001$ ). Similar measurements were made  
247 for a few *D. melanogaster* and *D. subobscura*, with comparable results.

248 To test heat tolerance, the temperature of the heating stage was quickly increased to the desired test  
249 temperature (~1.5 min), and once the temperature was stable the fly was left at this condition for 15 minutes.  
250 After heating, temperature would rapidly drop to room temperature (~1 min) when the thermal stage was  
251 turned off. The tip was then removed from the Peltier plate, and the fly was immediately checked for  
252 movement. After 15 minutes, the fly was again checked for movement, released by cutting the tip and then  
253 transferred to a 2-mL Eppendorf tube with fly medium in the bottom and air holes in the lid. Flies were  
254 checked for movement after one day of recovery following the heat exposure (recovery at 19 °C), and their  
255 status (live/dead) here was used for further analysis. Flies were regarded as “dead” if they were unable to  
256 move after the 24-hour recovery period.

257 Selective heating of either head (Fig. 1D) or abdomen (Fig. 1E) was performed using the same  
258 preparation as above, but with the body part to be heated placed on the heating stage while the rest of the  
259 body was placed away from the stage. This heating method resulted in large temperature differences between  
260 body parts, with heating of the head giving a larger difference than heating of the abdomen (Table 1).

261 Table 1. Temperature difference between abdomen and head measured topically on the dorsal side with  
262 ventral heating. Values reported as mean  $\pm$  s.e.m.

|                   | $T_{\text{abdomen}} - T_{\text{head}} (\text{°C})$ |                        |                      |
|-------------------|----------------------------------------------------|------------------------|----------------------|
|                   | <i>D. subobscura</i>                               | <i>D. melanogaster</i> | <i>D. mojavensis</i> |
| Heating whole-fly | $-0.92 \pm 0.15$                                   | $-2.06 \pm 0.19$       | $-1.63 \pm 0.17$     |
| Heating abdomen   | $3.35 \pm 0.28$                                    | $4.6 \pm 0.22$         | $4.79 \pm 0.29$      |
| Heating head      | $-6.44 \pm 0.28$                                   | $-9.16 \pm 0.41$       | $-10.19 \pm 0.36$    |

263

264 Control experiments were performed to test if the manipulation of the flies resulted in any mortality. In these  
265 experiments, the flies were prepared similarly to flies used for heating, but instead of heat exposure they  
266 were kept at room temperature and assessed for survival following the same protocol.

### 267 **Data analysis**

268 All data analyses were performed in R version 3.5.2 (R Core Team, 2018). Unless otherwise stated all results  
269 are reported as mean  $\pm$  s.e.m., and the critical value for statistical significance was 0.05. Onset of the  
270 phenotypes ( $T_{\text{back}}$  and  $T_{\text{coma}}$ ) and SD events ( $SD_{\text{first}}$  and  $SD_{\text{last}}$ ) were tested for co-occurrence using two-way  
271 ANOVAs for each assay type (ramp and static) with species and measured variable ( $T_{\text{back}}$ ,  $T_{\text{coma}}$ ,  $SD_{\text{first}}$ ,  
272  $SD_{\text{last}}$ ) in ramp and ( $t_{\text{back}}$ ,  $t_{\text{coma}}$ ,  $SD_{\text{first}}$ ,  $SD_{\text{last}}$ ) in static assays as factor variables. Tukey's HSD *post hoc* test  
273 was used to examine differences in onset of phenotypes and SD events within species. The correlation  
274 between heat stress phenotypes and onset of SD events was examined *between* species *within* assay type  
275 using linear regressions (lm()-function in R). The regression lines were compared to the line of unity  
276 (intercept = 0, slope =1) with the function linearHypothesis in the Car-package (Fox & Weisberg, 2011).

277 The survival assessments from the selective and whole-body heating experiments were paired with the  
278 temperatures measured from the thermocouples placed on head and abdomen. The temperature causing 50%  
279 mortality ( $LT_{50}$ ) after 24 hours was estimated through a non-linear least square-model using the nls()-  
280 function in R. The nls()-function was given the following equation of a sigmoidal curve:

$$281 \quad \text{Survival}(T) = \frac{1}{1 + \exp(-a*(T-b))} \quad \text{Eqn 1}$$

282 Where  $\text{Survival}(T)$  is survival at the temperature  $T$ ,  $a$  is the slope of the descending part of the sigmoidal  
283 curve and  $b$  is the estimate of  $LT_{50}$ . 95% level confidence intervals were calculated for each survival curve  
284 around the estimated  $LT_{50}$  using confint2() from the nlstools-package (Baty *et al.*, 2015). Curves with non-  
285 overlapping confidence intervals were regarded significantly different.

286 **Results**

287 ***Loss of CNS function and onset of heat stress phenotypes***

288 Neural function during heat exposure was examined by measuring negative DC shifts associated with  
289 spreading depolarisation (SD) in the central nervous system (CNS) in the head of five *Drosophila* species  
290 representing a range of heat tolerances. Flies were heated using either a ramping assay during which  
291 temperature (i.e. stress intensity) was gradually increased, or a static assay during which temperature was  
292 kept constant at 38 °C. The temperature (ramp) or time (static) of the first or last SD ( $SD_{\text{first}}$  and  $SD_{\text{last}}$ ,  
293 respectively) were then compared to the timing or temperature of two behavioural heat stress phenotypes  
294 measured using similar heating protocols (the phenotypes measured were the loss of coordinated movement  
295 ( $T/t_{\text{back}}$ ) and onset of heat coma ( $T/t_{\text{coma}}$ ), Fig. 2). These experiments were used to examine 1) if heat stress  
296 phenotypes correlate with signs of neural dysfunction, and 2) if this putative correlation is affected by the  
297 way heat stress is inflicted.

298 When flies were exposed to gradually increasing temperatures in a ramp, there were clear interspecific  
299 differences in the temperatures where the behavioural heat stress phenotypes were observed. For example,  
300 the least heat tolerant species (*D. immigrans*) showed loss of coordination ( $T_{\text{back}}$ ) at  $35.22 \pm 0.45$  °C and went  
301 into heat coma ( $T_{\text{coma}}$ ) at  $38.69 \pm 0.25$  °C, while the most heat tolerant species (*D. mojavensis*) reached  $T_{\text{back}}$   
302 at  $43.01 \pm 0.24$  °C and  $T_{\text{coma}}$  at  $45.11 \pm 0.34$  °C, giving the species system a range of  $T_{\text{back}}$  of 7.8 °C and  $T_{\text{coma}}$   
303 of 6.4 °C. Similarly, the temperatures at which SD events were observed gave interspecific differences of  
304 7.4 °C for  $SD_{\text{first}}$  and 6.5 °C for  $SD_{\text{last}}$  between the least and most tolerant species (again *D. immigrans* and *D.*  
305 *mojavensis*). Generally, we found that the temperature of  $T_{\text{back}}$  and  $T_{\text{coma}}$  coincided with perturbation of  
306 nervous function as indicated by  $SD_{\text{first}}$  and  $SD_{\text{last}}$  (Fig. 3). For three of the species (*D. mercatorum*, *D.*  
307 *melanogaster* and *D. mojavensis*) the two-way ANOVA followed by a Tukey HSD *post hoc* test did not  
308 reveal any significant differences in temperature between either of the behavioural phenotypes and the SD  
309 events. For the remaining two species (also the two least tolerant),  $T_{\text{coma}}$  was observed at a significantly  
310 higher temperature than the first SD event (Fig. 3). In *D. immigrans* it was also possible to separate the two  
311 heat stress phenotypes from each other, as  $T_{\text{back}}$  was observed at a significantly lower temperature than  $T_{\text{coma}}$ .  
312 However, we caution that the means of heating differed between the phenotype experiments and the  
313 neurological experiments, and that this could be a source of experimental noise (see Methods and Discussion  
314 for further arguments). To test if there was a general co-occurrence of phenotypic and neurological events,  
315 we performed linear regressions of the mean temperatures of either of the two behavioural phenotypes and  
316 the two neuronal phenotypes (Table 2). All regression combinations yielded high coefficients of  
317 determination ( $R^2$ : 0.73-0.9), and only one of the four regressions ( $SD_{\text{first}}$  against  $T_{\text{coma}}$ ) was significantly  
318 different from the line of unity (Table 2, see Supplements Fig. S2). The regression analysis indicated that

319 across species there were generally only small differences between the temperature where behavioural and  
 320 neurological collapse was observed.

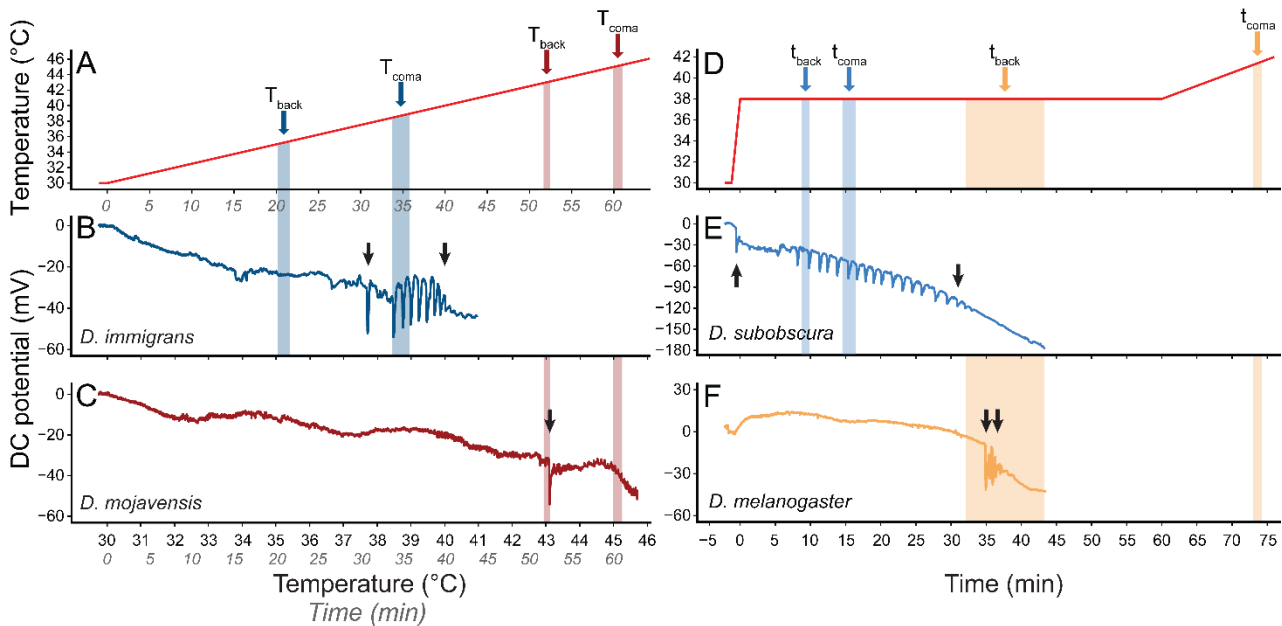

321

322 Fig. 2 Representative temperature and DC potential traces from ramping (A-C) and static (D-F) heat  
 323 exposures. The temperature profiles during (A) ramping and (D) static assays are marked with species-  
 324 coloured arrows and transparent boxes for the two phenotypes,  $T/t_{back}$  and  $T/t_{coma}$  (mean  $\pm$  s.e.m.), for two  
 325 species from each assay (The phenotypes and DC potential traces were not recorded from the same  
 326 individuals). (B) The heat sensitive *D. immigrans* experienced spreading depolarisation at a lower  
 327 temperature than the (C) heat tolerant *D. mojavensis* during a ramping assay. (E) Similarly, the heat sensitive  
 328 *D. subobscura* experienced spreading depolarisation sooner than the (F) more heat tolerant *D. melanogaster*  
 329 in the static assays. In (A-C), the x-axis show both measured temperature and the corresponding time  
 330 (italicised) according to the ramping rate of  $0.25\text{ }^{\circ}\text{C min}^{-1}$ , and in (D-F) the time scale is adjusted such that  
 331 time = 0 when the temperature reached  $38\text{ }^{\circ}\text{C}$ . Black arrows in (B-C, E-F) mark the  $SD_{first}$  (left) and  $SD_{last}$   
 332 (right) SD event, notice the example of a single SD event in *D. mojavensis* (C).

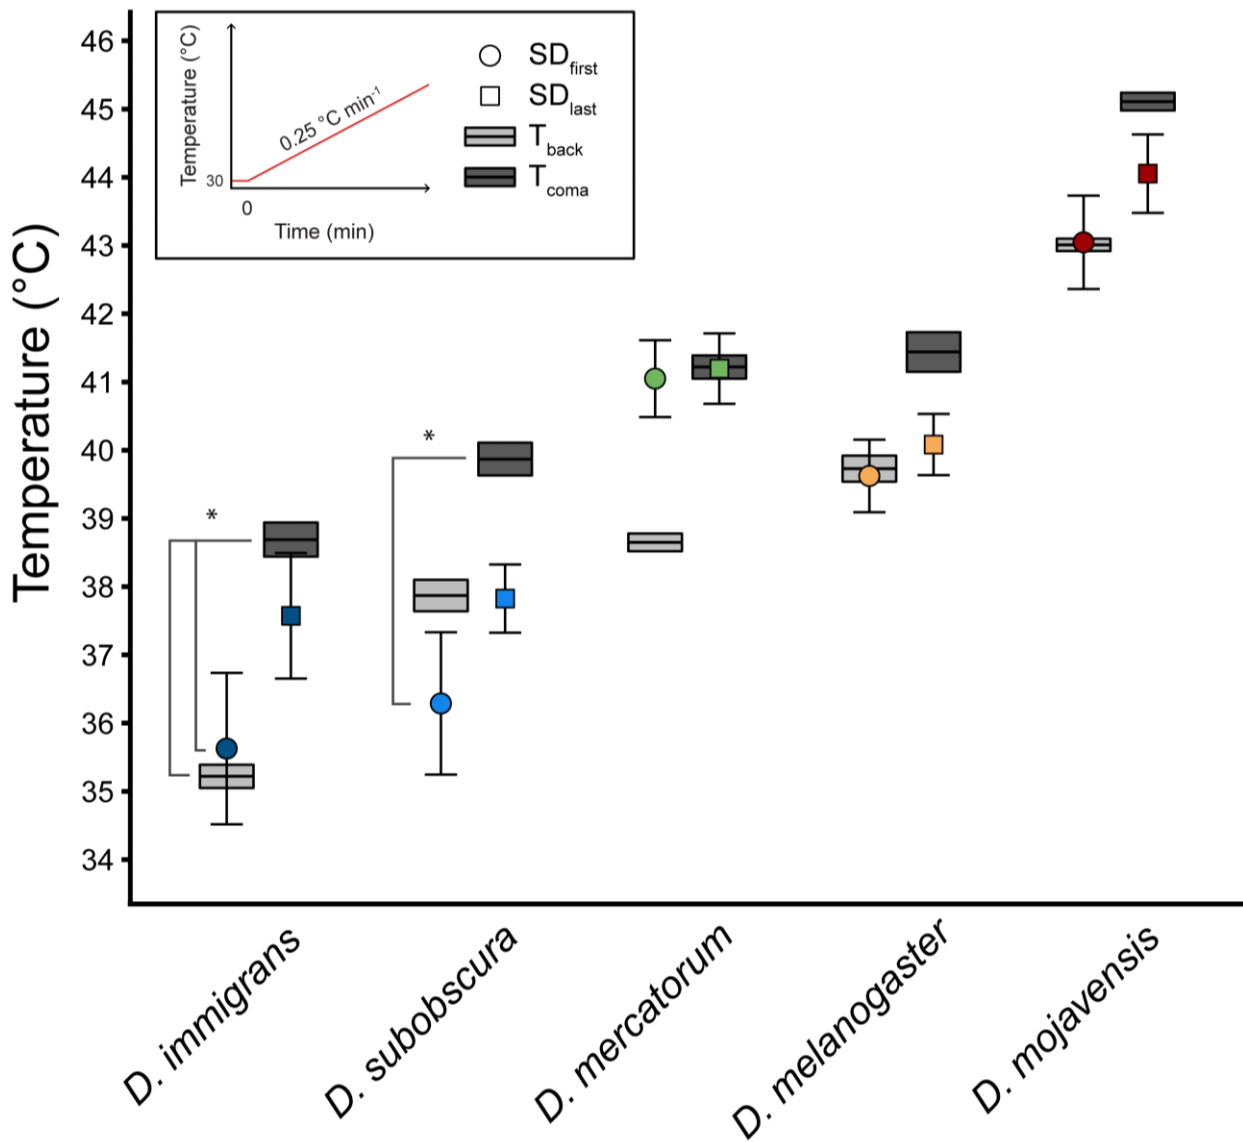

333

334 Fig. 3 Temperature of  $SD_{first}$  (circle) and  $SD_{last}$  (square) and the temperature of the two behavioural heat  
335 stress phenotypes  $T_{back}$  (light grey bars) and  $T_{coma}$  (dark grey bars) in a ramping assay.  $SD_{last}$  coincide with  
336  $SD_{first}$  in cases where only a single SD event was observed. SD measurements were performed on a Peltier  
337 element while the whole animal knockdown phenotype were observed from flies in glass vials submerged in  
338 a temperature-controlled water bath. Asterisks mark significant differences between either of the four  
339 phenotypes ( $p < 0.05$ ),  $n=7$  for each species and data are reported as mean  $\pm$  s.e.m.

340 Table 2 Coefficients of determination ( $R^2$ ) from linear regressions between behavioural phenotypes and SD  
 341 measurements,  $p$ -values are from the test comparing the linear regressions to the line of unity (i.e.  $p$ -values  
 342 above 0.05 indicate that the compared phenotypes occur at the same temperature/time). The highest  $R^2$  in  
 343 each assay type is marked in bold italics, and linear regressions which were different from the line of unity ( $p$   
 344  $< 0.05$ ) are underlined. See Supplements Fig. S2-S3 for a graphical representation of the linear regressions.

|                                                         | Dynamic                                  |                                          | Static                           |                         |
|---------------------------------------------------------|------------------------------------------|------------------------------------------|----------------------------------|-------------------------|
|                                                         | $T_{\text{back}}$ ( $^{\circ}\text{C}$ ) | $T_{\text{coma}}$ ( $^{\circ}\text{C}$ ) | $t_{\text{back}}$ (min)          | $t_{\text{coma}}$ (min) |
| $\text{SD}_{\text{first}}$ ( $^{\circ}\text{C}$ or min) | $R^2 = 0.73, p = 0.699$                  | $R^2 = 0.8, p = \underline{0.041}$       | $R^2 = \mathbf{0.86}, p = 0.812$ | $R^2 = 0.65, p = 0.309$ |
| $\text{SD}_{\text{last}}$ ( $^{\circ}\text{C}$ or min)  | $R^2 = 0.78, p = 0.260$                  | $R^2 = \mathbf{0.9}, p = 0.089$          | $R^2 = 0.77, p = 0.392$          | $R^2 = 0.65, p = 0.632$ |

345  
 346 During constant heat exposure (38  $^{\circ}\text{C}$ , Fig. 4), we recorded the timing of SD events and behavioural heat  
 347 stress phenotypes and again we found these behavioural and neurological measures to coincide. Note that for  
 348 some species we started to increase the temperature by 0.25  $^{\circ}\text{C min}^{-1}$  after 1 hour of exposure, but that all  
 349 measures are reported in minutes of exposure. Between species there was a clear increase in the heat  
 350 exposure duration that the nervous system could uphold function with increasing heat tolerance of the  
 351 species (according to the timing of behavioural heat stress phenotype onset), although the least tolerant  
 352 species in terms of neuronal failure (*D. subobscura*) was the second least tolerant when assessed for  
 353 behavioural phenotype (*D. immigrans* was the least tolerant on this term, as in the ramping assay) (Fig. 4). A  
 354 two-way ANOVA followed by a Tukey HSD *post hoc* test revealed that it was not possible to separate the  
 355 timing of behavioural heat stress phenotypes and the neurological perturbations in *D. immigrans*, *D.*  
 356 *subobscura* and *D. mojavensis*. In *D. mercatorum* and *D. melanogaster* significant differences between the  
 357 timing of behavioural and neurological phenotypes were found, with a delayed coma onset for *D.*  
 358 *melanogaster* relative to both  $t_{\text{back}}$  and the SD events, and a relatively long time span between the loss of  
 359 coordinated movement and the last SD event in *D. mercatorum* (Fig. 4). However, linear regressions on the  
 360 mean time of the four possible combinations of SD events and behavioural phenotypes showed a high  
 361 correlation between both  $\text{SD}_{\text{first}}$  and  $\text{SD}_{\text{last}}$  with  $t_{\text{back}}$  ( $R^2$ : 0.77-0.86), while the correlations between SD types  
 362 and  $t_{\text{coma}}$  were slightly weaker ( $R^2$ : 0.65) (Table 2, see Supplements Fig. S3). When the four regression lines  
 363 were compared to the line of unity, none of them were significantly different, again suggesting that across  
 364 the species system there were generally an overlap between the exposure durations that resulted in  
 365 behavioural and neurological phenotypes.

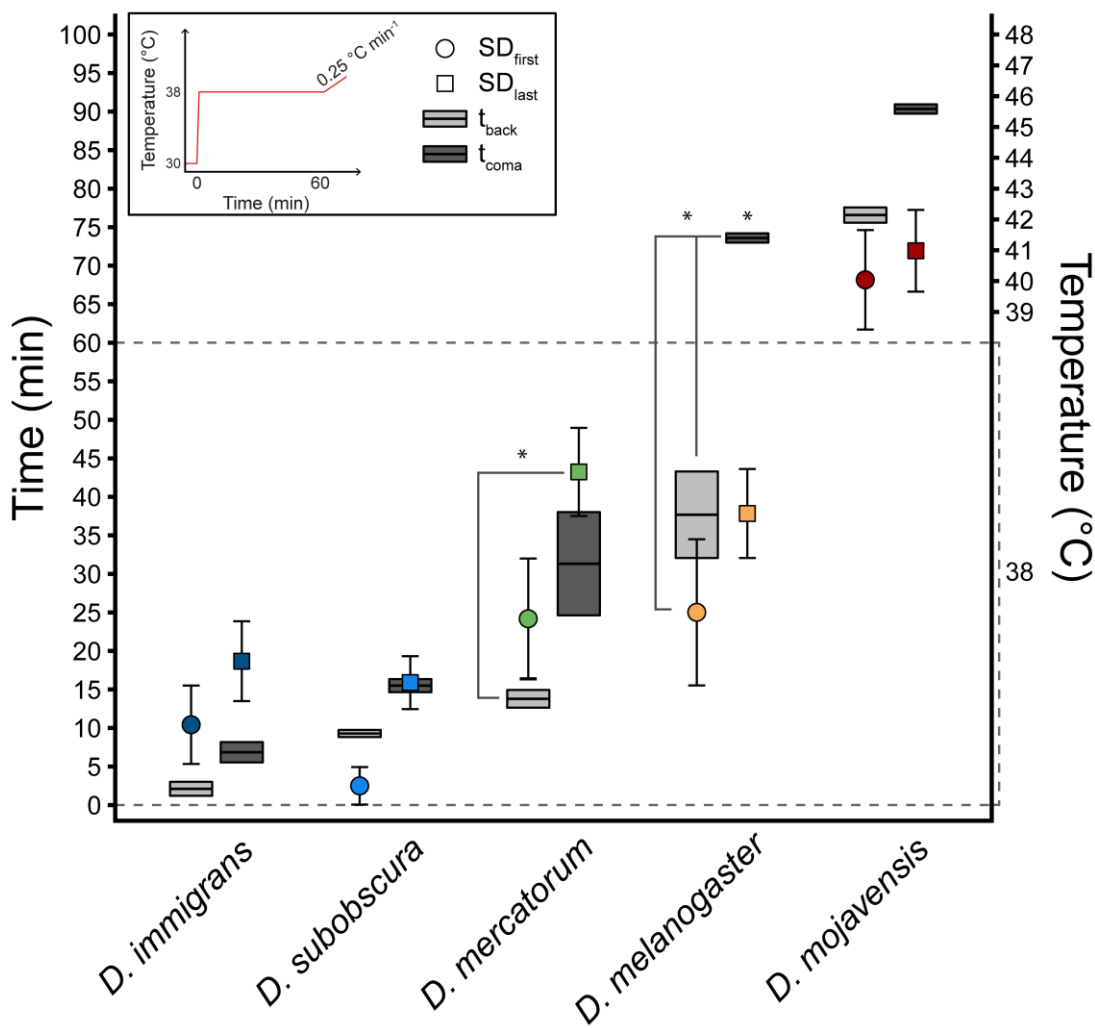

366

367 Fig. 4 Exposure time in a static assay until SD<sub>first</sub> (circle) and SD<sub>last</sub> (square) and loss of coordinated  
 368 movement (t<sub>back</sub>, light grey bars) and onset of coma (t<sub>coma</sub>, dark grey bars). The time scale is adjusted such  
 369 that time = 0 when the temperature reached 38 °C (average time to heat from room temperature to 38 °C was  
 370 73 s for SD measurements). After 1 hour at 38°C the temperature was increased by 0.25 °C min<sup>-1</sup>, and SDs  
 371 and phenotypes that occurred during the ramp is here presented on the time scale (with the corresponding  
 372 temperature on the secondary y-axis). SD measurements were performed on a Peltier plate while behavioural  
 373 phenotypes were assessed from flies in glass vials submerged in a temperature-controlled water bath.  
 374 Asterisks mark significant differences between either of the four phenotypes ( $p < 0.05$ ),  $n=7$  for each species  
 375 and data are presented as mean  $\pm$  s.e.m.

376 Examination of the DC potential measurements showed considerable variance between preparations. Some  
 377 preparations were characterised by only eliciting a single SD event (meaning that SD<sub>first</sub> and SD<sub>last</sub> occurred  
 378 at the same time/temperature, Fig. 2C) while other specimens showed multiple (2-30) SD events (see  
 379 examples in Fig. 2). Comparison between the ramping and constant heat exposures showed that single SD  
 380 events were much more prevalent during the ramping heat exposure (40% of individuals showed single SD,  
 381  $n=35$ ) than in the constant heat exposure (9% showed single SD,  $n=29$ ) (see Supplements Fig. S4).  
 382 Furthermore, when the constant heat exposure for 1 hour was followed by a ramping increase in temperature,  
 383 flies would mostly elicit just a single SD (66%,  $n=6$ ). All five species were able to display both single and

384 repeated SD events and in roughly the same proportion (2-4 preparations of each species (out of 7) showed a  
385 single SD during ramping). The number of SD events observed in “multiple” SD events also differed with  
386 heat exposure assay. In static assays, preparations with multiple SDs elicited  $11.38 \pm 1.56$  SD events while  
387 preparations with multiple SDs during ramping assays only had  $5.95 \pm 1.12$  SD events (two sample t-test,  
388  $t=2.83$ ,  $df=43.15$ ,  $p=0.007$ ).

### 389 ***Selective heating of the head and abdomen***

390 As heat coma and heat death often occur in close succession, we performed an experiment designed to  
391 investigate and compare the heat sensitivity of the head (site of nervous function measurements from the first  
392 experiment) and the abdomen (consisting more of visceral tissues) (see Fig. 1C-E). This test involved  
393 restraining flies in pipette tips and non-heated controls for handling showed 0% mortality for *D. subobscura*  
394 and *D. melanogaster*, and 13% mortality for *D. mojavensis* after 24 hours ( $n=14/16/39$ , respectively). For  
395 these experiments the temperature estimated to cause 50% mortality in the flies 24 hours after heat exposure  
396 ( $LT_{50}$ ) was used to compare heat sensitivity between body parts.

397 Both whole-fly and selective heating showed that the heat tolerant *D. mojavensis* had higher values of  
398  $LT_{50}$  than the moderate heat tolerant *D. melanogaster*, which in turn also had higher values of  $LT_{50}$  than the  
399 heat sensitive *D. subobscura* (Fig. 5). When the whole fly was heated simultaneously, we did record  
400 differences between head and abdominal temperature (measured topically on the dorsal side), but these  
401 differences were generally less than 2 °C (see Table 1 and Supplements Fig. S1). In experiments using  
402 selective heating of either the head or abdomen the flies were characterised by much larger regional  
403 differences in temperature ( $\Delta T$  ranging 3.35-10.19 °C depending on species and body part heated, see Table  
404 1).

405 The experiments revealed species specific differences in the relation between  $LT_{50}$  estimates during  
406 whole animal heating and selective heating. For *D. mojavensis*, heating the abdomen (and maintaining the  
407 head at a lower temperature,  $\Delta T=4.79 \pm 0.29$  °C) did not change the  $LT_{50}$  compared to abdominal  
408 temperature when the whole fly was heated ( $LT_{50}$  was 0.35 °C higher but the estimates have overlapping  
409 95% confidence intervals, Fig. 5A). Thus for *D. mojavensis*,  $LT_{50}$  was the same irrespective if the head was  
410 kept cool or warm during heating of the abdomen. When the head of *D. mojavensis* was heated selectively  
411 (with the abdomen considerably cooler:  $\Delta T=10.19 \pm 0.36$  °C),  $LT_{50}$  increased by 2.33 °C compared to flies  
412 experiencing whole animal heating (non-overlapping 95% confidence interval, Fig. 5B). Thus, a higher head  
413 temperature was needed to evoke mortality in *D. mojavensis* when the abdomen was relieved from heat  
414 stress.

415 Performing the experiments on *D. melanogaster* we observed slightly smaller differences between  
416 body parts than in *D. mojavensis*, both when the head was selectively heated (abdomen maintained at a lower



417 temperature,  $\Delta T=9.16 \pm 0.41$  °C) and when the abdomen was heated (head kept cooler,  $\Delta T=4.6 \pm 0.22$  °C).  
418 For *D. melanogaster* we found  $LT_{50}$  to increase when applying selective heating on the abdomen ( $LT_{50}$  was  
419 2.59 °C higher, Fig. 5A) and the head ( $LT_{50}$  was 3.77 °C higher, Fig. 5B), compared to  $LT_{50}$  resulting from  
420 whole-fly heating. Accordingly, maintaining one end of a *D. melanogaster* at a lower temperature than the  
421 other, increases heat tolerance of the fly.

422 In experiments with *D. subobscura*, the temperature differences between body parts were smaller than  
423 for the other two species. Selectively heating the abdomen made the abdomen  $3.35 \pm 0.28$  °C warmer than  
424 the head but did not change the  $LT_{50}$  of the abdomen when compared to that of whole-fly heating ( $LT_{50}$  was  
425 0.13 °C lower for the selective heating, likely attributed to the shape of the survival curve, but with  
426 overlapping 95% confidence intervals). When selectively heating the head, resulting in a  $6.44 \pm 0.28$  °C  
427 colder abdomen, head  $LT_{50}$  increased by 1.87 °C compared to head  $LT_{50}$  of whole-animal heated flies.

428

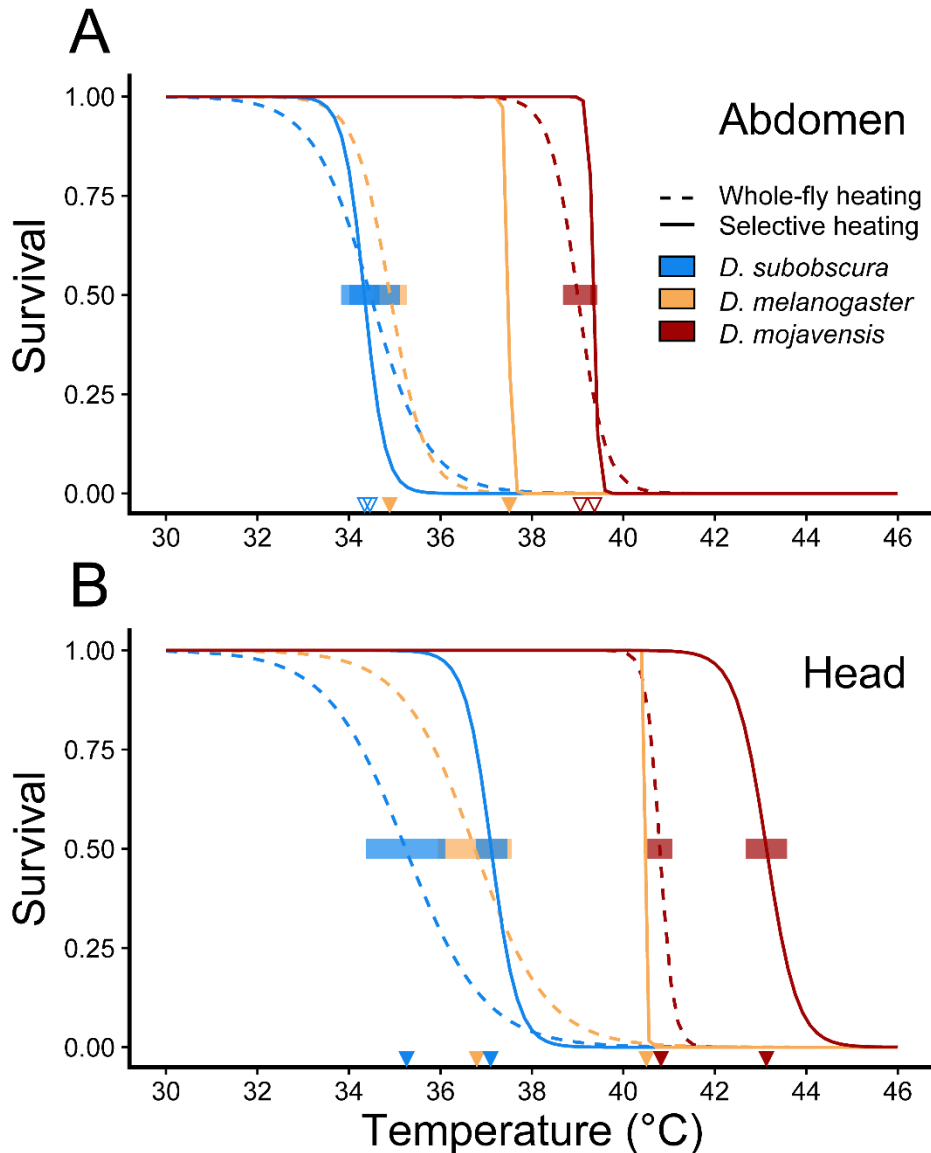

429

430 Fig. 5 Survival curves and  $LT_{50}$  estimates for whole-fly and selective heating of *D. subobscura* (blue), *D.*  
431 *melanogaster* (yellow) and *D. mojavensis* (red). (A) Survival curves are related to the temperature measured  
432 topically on the abdomen during selective heating of the abdomen (full lines) and whole-fly heating (dashed  
433 lines). (B) Survival curves are related to the temperature measured topically on the head during selective  
434 heating of the head (full lines) and whole-fly heating (dashed lines). Note that whole-fly heating curves are  
435 slightly different in A and B because they are based on the temperature measurements from the abdomen and  
436 head, respectively.  $LT_{50}$ , the temperature that resulted in 50% mortality, was estimated for all survival  
437 curves, and is marked on the temperature axis by a species coloured triangle. If the 95% confidence intervals  
438 of selective heating and whole-fly heating  $LT_{50}$  (shaded, species coloured areas) within a species did not  
439 overlap, a closed triangle was used, and conversely, if confidence intervals overlapped, open triangles were  
440 used. Whole-fly heating and selective heating of abdomen and head were performed on  $n=24/15/18$  for *D.*  
441 *subobscura*,  $n=24/17/16$  for *D. melanogaster* and  $n=35/17/17$  for *D. mojavensis*, respectively. Selective  
442 heating of *D. melanogaster* yielded very steep survival curves where the confidence intervals could not be  
443 determined.

444 **Discussion**

445 Inter- and intraspecific differences in heat tolerance have been demonstrated for *Drosophila* in multiple  
446 studies (Castañeda et al., 2015; Jørgensen et al., 2019; Kellermann et al., 2012; Kimura, 2004; Overgaard et  
447 al., 2014; Stratman & Markow, 1998). These differences have often been measured using the onset of  
448 reversible behavioural phenotypes such as loss of coordinated movement and entry into heat coma, or by  
449 measuring heat induced mortality in animals exposed to high temperatures (Lutterschmidt & Hutchison,  
450 1997a). However, it is still unclear which physiological perturbations are the proximate cause of the different  
451 heat tolerance endpoints (but see Robertson (2004) and Rodgers *et al.* (2010)), and this has been particularly  
452 difficult to discern because of the close proximity of the endpoints at high temperatures. Multiple  
453 physiological mechanisms have been suggested as the proximate cause of heat mortality, including oxygen  
454 transport limitations, protein denaturation, loss of membrane integrity or ion homeostasis, and mitochondrial  
455 dysfunction (Bowler, 2018; Davison & Bowler, 1971; Gladwell, 1975; Pörtner, 2001; Somero, 1995). The  
456 endpoint prior to mortality, the onset of heat coma, has instead been suggested to be caused by either  
457 muscular or nervous failure (Bowler, 1963; Gladwell *et al.*, 1975; Robertson, 2004). In locusts exposed to  
458 increasing temperature, ventilation failed concurrently with an abrupt surge in extracellular  $[K^+]$ , which has  
459 been related to a drop in DC potential that is a reliable marker of spreading depolarisation in the CNS (SD)  
460 (Robertson, 2004; Rodgers *et al.*, 2007). Once the locust was returned to benign temperatures, extracellular  
461  $[K^+]$  surrounding the neurons returned to baseline levels, and the motor pattern ventilation resumed (Rodgers  
462 *et al.*, 2007; Rodgers *et al.*, 2010).

463 To our knowledge there has been no comprehensive comparative studies investigating species differences in  
464 CNS function at high temperature and the aim of this study was to examine the role of the nervous system in  
465 relation to heat tolerance in five *Drosophila* species. The temperatures at which two behavioural phenotypes  
466 (loss of motor control ( $T_{back}$ ) and loss of motor function ( $T_{coma}$ )) were observed were compared to the  
467 temperature of neuronal failure (SD) as assessed by electrophysiological measurements of DC potentials in  
468 the fly brain during ramping heat exposure, and likewise the timing of SD and behavioural phenotypes  
469 during constant heat exposure. These experiments revealed a good correlation between the failure of motor  
470 control/function and neuronal failure, however it is unclear if failure of the CNS is also causing heat  
471 mortality. Thus, we designed an experiment to test the sensitivity to heat exposure on different parts of the  
472 fly body to further examine if the nervous system could be limiting heat stress survival.

473 ***Heat stress phenotypes correlate with onset of nervous failure***

474 Measurements of spreading depolarisation (i.e. large negative shifts in DC potential) during both ramping  
475 and static assays, showed that, overall, perturbation of nervous function correlated well with the two  
476 behavioural heat stress phenotypes ( $t/T_{back}$  and  $t/T_{coma}$ ) (Fig. 3-4). Onset times and temperatures of the  
477 behavioural coma phenotype were similar to the values previously reported in the five species measured in

478 similar heat tolerance assays (Jørgensen *et al.*, 2019). The loss of motor function was assessed on untethered  
479 flies in glass vials with a homogeneous temperature, whereas SD measurements required the flies to be  
480 fastened and furthermore a hole was cut in the head and abdomen to insert measurement electrodes (Fig. 1).  
481 The invasive preparation required for SD measurements could potentially alter heat tolerance, and we also  
482 observed a surprisingly large internal thermal gradient in the fly (sometimes more than 2 °C) when using the  
483 Peltier plate for heating. The differences in experimental protocols between behavioral and neurological  
484 experiments are likely to introduce some noise in the comparison between these experiments, particularly  
485 because we know already that the rate of heat injury accelerates extremely quickly at high temperature ( $Q_{10}$   
486 of heat injury accumulation rate is often  $>10.000$ ). Thus, very small differences in exposure temperature (or  
487 time) can separate tolerance and death during heat exposure (Jørgensen *et al.*, 2019). Considering these  
488 sources of variation, it would be unexpected to find a perfect correlation between the two experiment types.  
489 Despite these “experimental challenges” we found clear patterns of association between loss of motor control  
490 and the occurrence of SD events in the CNS (Figs. 3 and 4).

491 Generally, the characteristics of heat stress phenotypes follow a progressive loss of motor control,  
492 from first hyperactivity, through loss of coordinated movement and spasms to the onset of heat coma or heat  
493 stupor where the animal is unresponsive (Cossins & Bowler, 1987; Heath & Wilkin, 1970; Lutterschmidt &  
494 Hutchison, 1997a). Accordingly, for these experiments it follows that the two behavioral phenotypes  $t/T_{\text{back}}$   
495 and  $t/T_{\text{coma}}$  are bound in a way such that  $t/T_{\text{back}}$  will occur prior to (or at a lower temperature) compared to  
496  $t/T_{\text{coma}}$ . Similarly, the first SD must precede the last SD, unless only a single SD event is observed (in which  
497 case the first and last SD are the same). It is therefore tempting to conclude that  $SD_{\text{first}}$  is linked to  $t/T_{\text{back}}$  and  
498 likewise  $SD_{\text{last}}$  to  $t/T_{\text{coma}}$  but with the lack of clear statistical support for this, we will only conclude that it is  
499 likely that the two closely occurring behavioural phenotypes ( $t/T_{\text{back}}$  and  $t/T_{\text{coma}}$ ) are linked to the  
500 simultaneously occurring SD events ( $SD_{\text{first}}$  and  $SD_{\text{last}}$ , respectively). The relation between behavioural  
501 phenotypes and nervous dysfunction has also been examined at low temperatures in different species of  
502 *Drosophila*, where temperature of cold coma onset is also highly correlated with the temperature of SD in  
503 the CNS of *Drosophila* (Andersen & Overgaard, 2019; Andersen *et al.*, 2018). However, similar to our heat  
504 experiments it is difficult to determine specifically how first and last SD events are linked to loss of motor  
505 control ( $T_{\text{back}}$ ) or loss of movement ( $T_{\text{coma}}$ ). Importantly, there is no association between cold-induced SD  
506 events and cold mortality as insects can survive cold in a “comatose” state for long periods of time  
507 (MacMillan & Sinclair, 2011; Overgaard & MacMillan, 2017).

508 The present study found that single SD events (instead of multiple events) were more prevalent in  
509 ramping experiments than during static heat exposure (Supplements Fig. S4). Additionally, the number of  
510 SD events that occurred in preparations with more than one SD, was significantly higher during ramping heat  
511 exposure compared to static. In hyperthermic locusts single continuous SD events that persist until the heat

512 exposure is removed are the most prevalent, but repetitive SD events have been observed in locusts treated  
513 with ouabain (Rodgers *et al.*, 2009; Spong *et al.*, 2014) and in hyperthermic brain slices from immature rats  
514 (Wu & Fisher, 2000). Contrary to hyperthermia, which is thought to lead to accumulation of  $[K^+]$ , ouabain is  
515 limiting  $K^+$  clearance through its inhibition of the  $Na^+/K^+$ -ATPase (Rodgers *et al.*, 2009). According to  
516 Rodgers *et al.* (2009) the repetitive SD events are caused by transient surges in extracellular  $[K^+]$  that are  
517 resulting from imbalances between accumulation and clearance of  $K^+$ . A speculative explanation for the  
518 increased prevalence of single SD events in ramps could be that when temperature is gradually increased, the  
519 mitigation of the physiological conditions resulting in SDs (high extracellular  $[K^+]$  in the space surrounding  
520 the CNS) cannot keep up as heat stress increases exponentially (Jørgensen *et al.*, 2019), resulting in a total  
521 silencing of the CNS. Conversely, the static exposure may allow the fly to remove some of the  $[K^+]$  that has  
522 accumulated in the extracellular space. This could relieve the condition causing the SD event and  
523 temporarily restore some nervous function until a new SD events occurs when  $K^+$  clearance is surpassed by  
524 the accumulation (Rodgers *et al.*, 2010). Despite differences in experimental protocols we here clearly  
525 demonstrate that SD events in the CNS and the loss of motor function or entry into coma coincide in  
526 *Drosophila* species with different levels of heat tolerance. This indicates that loss of CNS function is the  
527 proximal cause to the onset of heat coma ( $CT_{max}$ ), a behavioural phenotype that is commonly used to  
528 describe animal heat tolerance. However, as found in cold *Drosophila*, it is also important to emphasise that  
529 the significance of nervous dysfunction in the onset of coma does not necessarily mean that the loss of  
530 nervous function directly results in heat death.

531

### 532 ***Selective heating of the head and abdomen suggests interspecific differences in body part heat sensitivity***

533 To investigate the role of the CNS failure for heat mortality, we designed an experiment to estimate heat  
534 sensitivity of the head and the abdomen when either the whole fly was heated, or when one body part was  
535 selectively exposed to a higher temperature than the rest of the fly. If CNS failure at high temperatures is the  
536 main cause of heat mortality, then we would expect that maintaining the head at a lower temperature than the  
537 abdomen should also lower mortality. Conversely, if the head was heated selectively, we would expect  
538 mortality to occur at the same temperature as when the whole fly was heated. Manipulations of body  
539 compartment temperatures have previously been used successfully in crayfish (Bowler, 1963), goldfish  
540 (Friedlander *et al.*, 1976) and Atlantic cod (Jutfelt *et al.*, 2019) to investigate the heat sensitivity of either  
541 heat coma or heat mortality. To our knowledge this is the first study to attempt such a study in small insects  
542 such as *Drosophila*.

543 Using the experimental setup with a fly tethered in a pipette tip, we found clear differences in heat  
544 tolerance (measured as  $LT_{50}$ ) between species, such that the desert species *D. mojavensis* was more heat  
545 tolerant than the cosmopolitan *D. melanogaster*, which in turn was more heat tolerant than the temperate *D.*

546 *subobscura*. This finding is entirely consistent with the other heat stress phenotypes measured in the present  
547 study and with findings from previous studies (Jørgensen *et al.*, 2019; Kellermann *et al.*, 2012). The  
548 tethering of the flies was not in itself invasive as attested by no mortality of controls in *D. subobscura* and *D.*  
549 *melanogaster*, and low mortality in *D. mojavensis* controls. Selective heating of abdomen and head suggests  
550 interspecific differences in body part sensitivity (Fig. 5). All three species showed increased heat tolerance of  
551 the head when the abdomen was simultaneously kept at a lower temperature (i.e. heating only the head, Fig.  
552 1D). This suggest that the head may not be the most heat sensitive body part (Fig. 5B). When the head was  
553 maintained at a lower temperature (abdomen was heated, Fig. 1E), the species differed in response (Fig. 5A).  
554 *D. subobscura* and *D. mojavensis* maintained a similar  $LT_{50}$  for the abdomen when only the abdomen was  
555 heated compared to heating of the whole animal, suggesting that the abdomen is a heat sensitive body part in  
556 these two species since selective heating of abdomen gives the same heat tolerance as heating the whole fly.  
557 *D. melanogaster* showed a different response as  $LT_{50}$  increased in flies when only the abdomen was heated  
558 (i.e. a similar response as when the head was selectively heated). This suggest that for *D. melanogaster* both  
559 body parts are injured through heat exposure and that the damage may be additive such that it is the total  
560 amount of accumulated injury that determines heat tolerance. Overall these experiments showed that the  
561 head was not a particular heat sensitive region and the higher  $LT_{50}$  values in flies with selective heating of  
562 the head suggest that neuronal tissue can survive some degrees beyond the temperature causing SD events.

563 The increase in  $LT_{50}$  for flies with selective heating of the head support the notion that spreading  
564 depolarisation is an adaptive mechanism to protect the organism during stress (Robertson, 2004; Rodgers *et*  
565 *al.*, 2010). We observed in multiple cases where flies used for the  $LT_{50}$  experiments would enter a heat coma  
566 (they were completely unresponsive immediately following heat exposure), but they would later resume  
567 movement and often recover normal behaviour. Likewise, we observed in the initial behavioural phenotype  
568 assays that flies removed from the heat immediately after  $t/T_{coma}$  had been observed would recover  
569 subsequently. Together these data indicate that SD events are not directly associated with mortality and that  
570 nervous failure is not a proximal cause of heat death. Nevertheless, thermal sensitivity of the nervous system  
571 could impose a critical challenge to fitness if critical behaviours, such as escape responses, are impaired at  
572 stressful temperatures (Montgomery & Macdonald, 1990).

573 In conclusion, experiments performed for this study show clear interspecific differences in the extent  
574 (time/temperature) that the flies can tolerate heat stress, which is related to the overall heat tolerance of the  
575 species. Based on the first experiments we find that loss of nervous function is likely to be the cause of the  
576 characteristic loss of coordinated movement and coma that is classically used to assess heat tolerance in  
577 insects ( $CT_{max}$ ). Our experimental conditions did not allow us to conclude specifically if it is the first or last  
578 SD event that is the cause of these phenotypes, and it is also possible that related neuronal failure in other  
579 ganglia could play a role. Our second set of experiments with selective heating showed that the head (mainly

580 neuronal tissue) is not particularly heat sensitive compared to other parts of the body. Thus, entry into  
581 (reversible) coma and heat mortality are likely different physiological processes and loss of brain function is  
582 not the proximal cause of heat death.

583 The temperature and time span from when the most heat-sensitive species suffered from neural failure  
584 to when the CNS of the most heat tolerant species succumbed was large, inviting further studies to  
585 investigate adaptations in the CNS to alter heat sensitivity. Our results strongly suggest that hyperthermic  
586 loss of CNS function and loss of motor coordination and function (coma) are correlated, which is of clear  
587 interest to uncover the physiological perturbations limiting heat tolerance. The role of muscle and  
588 neuromuscular synapses in loss of function was not examined in the present study, and although they may  
589 also coincide with loss of coordinated movement and heat coma, the correlation between the upstream CNS  
590 silencing and loss of function is striking. However, it is also important to appreciate that even small  
591 disturbances in nervous function at less stressful temperatures could mean the difference between life and  
592 death to an unrestrained animal in nature if its escape response is retarded by nervous dysfunction.

### 593 **Acknowledgements**

594 We would like to thank Kirsten Kromand for animal care, Niels U. Kristiansen for help with preparation of  
595 thermocouples and Mads K. Andersen for help with the experimental setup and for valuable discussions of  
596 the results and experimental design.

### 597 **Competing interests**

598 No competing interests declared

### 599 **Funding**

600 This research was funded by a grant from the Danish Council for Independent Research | Natural Sciences  
601 (Det Frie Forskningsråd | Natur og Univers) (J.O.).

602 **References**

- 603 **Addo-Bediako, A., Chown, S. L. and Gaston, K. J.** (2000). Thermal tolerance, climatic variability and latitude. *Proc.*  
604 *Biol. Sci.* **267**, 739–745.
- 605 **Andersen, M. K. and Overgaard, J.** (2019). The central nervous system and muscular system play different roles for  
606 chill coma onset and recovery in insects. *Comp. Biochem. Physiol. Part A* **233**, 10–16.
- 607 **Andersen, J. L., Manenti, T., Sørensen, J. G., MacMillan, H. A., Loeschcke, V. and Overgaard, J.** (2015). How to  
608 assess *Drosophila* cold tolerance: chill coma temperature and lower lethal temperature are the best predictors of  
609 cold distribution limits. *Funct. Ecol.* **29**, 55–65.
- 610 **Andersen, M. K., Jensen, N. J. S., Robertson, R. M. and Overgaard, J.** (2018). Central nervous system shutdown  
611 underlies acute cold tolerance in tropical and temperate *Drosophila* species. *J. Exp. Biol.* **221**, jeb179598.
- 612 **Armstrong, G. A. B., Xiao, C., Krill, J. L., Seroude, L., Dawson-Scully, K. and Robertson, R. M.** (2011). Glial  
613 Hsp70 protects K<sup>+</sup> homeostasis in the *Drosophila* brain during repetitive anoxic depolarization. *PLoS One* **6**,  
614 e28994.
- 615 **Baty, F., Ritz, C., Charles, S., Brutsche, M., Flandrois, J.-P. and Delignette-Muller, M.-L.** (2015). A Toolbox for  
616 Nonlinear Regression. *J. Stat. Softw.* **66**, 1–21.
- 617 **Bayley, J. S., Winther, C. B., Andersen, M. K., Grønkjær, C., Nielsen, O. B., Pedersen, T. H. and Overgaard, J.**  
618 (2018). Cold exposure causes cell death by depolarization-mediated Ca<sup>2+</sup> overload in a chill-susceptible insect.  
619 *Proc. Natl. Acad. Sci.* 201813532.
- 620 **Bigelow, W. D.** (1921). The logarithmic nature of thermal death time curves. *J. Infect. Dis.* **29**, 528–536.
- 621 **Bowler, K.** (1963). A Study of the Factors Involved in Acclimatization to Temperature and Death at High  
622 Temperatures in *Astacus pallipes* I. Experiments on intact animals. *J. Cell. Comp. Physiol.* **62**, 119–132.
- 623 **Bowler, K.** (1981). Heat death and cellular heat injury. *J. Therm. Biol.* **6**, 171–178.
- 624 **Bowler, K.** (2018). Heat death in poikilotherms: Is there a common cause? *J. Therm. Biol.* **76**, 77–79.
- 625 **Bowler, K., Duncan, C. J., Gladwell, R. . T. and Davison, T. F.** (1973). Cellular heat injury. *Comp. Biochem.*  
626 *Physiol. Part A Physiol.* **45**, 441–450.
- 627 **Castañeda, L. E., Rezende, E. L. and Santos, M.** (2015). Heat tolerance in *Drosophila subobscura* along a latitudinal  
628 gradient: Contrasting patterns between plastic and genetic responses. *Evolution (N. Y.)* **69**, 2721–2734.
- 629 **Cossins, A. R. and Bowler, K.** (1987). *Temperature Biology of Animals*. 1st ed. London: Chapman and Hall.
- 630 **Cowles, R. B. and Bogert, C. M.** (1944). A preliminary study of the thermal requirements of desert reptiles. *Bull. Am.*  
631 *Museum Nat. Hist.* **83**, 261–296.
- 632 **Davison, T. F. and Bowler, K.** (1971). Changes in the Functional Efficiency of Flight Muscle Sarcosomes during Heat



- 633 Death of Adult *Calliphora erythrocephala*. *J. Cell. Physiol.* **78**, 37–48.
- 634 **Feder, M. E. and Hofmann, G. E.** (1999). Heat-shock proteins, molecular chaperones, and the stress response:  
635 evolutionary and ecological physiology. *Annu. Rev. Physiol.* **61**, 243–282.
- 636 **Fox, J. and Weisberg, S.** (2011). *An R Companion to Applied Regression*. Second Edi. Thousand Oaks CA: Sage.
- 637 **Fraenkel, G.** (1960). Lethal High Temperatures for Three Marine Invertebrates: *Limulus polyphemus*, *Littorina littorea*  
638 and *Pagurus longicarpus*. *Oikos* **11**, 171–182.
- 639 **Friedlander, M. J., Kotchabhakdi, N. and Prosser, C. L.** (1976). Effects of Cold and Heat on Behavior and  
640 Cerebellar Function in Goldfish. *J. Comp. Physiol. A* **112**, 19–45.
- 641 **Gaston, K. J. and Chown, S. L.** (1999). Elevation and climatic tolerance: a test using dung beetles. *Oikos* **86**, 584–590.
- 642 **Gladwell, R. T.** (1975). Heat death in the crayfish *Austropotamobius pallipes*: Thermal inactivation of muscle  
643 membrane-bound ATPases in warm and cold adapted animals. *J. Therm. Biol.* **1**, 95–100.
- 644 **Gladwell, R. T., Bowler, K. and Duncan, C. J.** (1975). Heat death in the crayfish *Austropotamobius pallipes* - Ion  
645 movements and their effects on excitable tissues during heat death. *J. Therm. Biol.* **1**, 79–94.
- 646 **Hamby, R. J.** (1975). Heat effects on a marine snail. *Biol. Bull.* **149**, 331–347.
- 647 **Hazel, J. R.** (1995). Thermal Adaptation in Biological Membranes: Is Homeoviscous Adaptation the Explanation?  
648 *Annu. Rev. Physiol.* **57**, 19–42.
- 649 **Heath, J. E. and Wilkin, P. J.** (1970). Temperature responses of the desert cicada, *Diceroprocta apache* (Homoptera,  
650 Cicadidae). *Physiol. Zool.* **43**, 145–154.
- 651 **Heath, J. E., Hanegan, J. L., Wilkin, P. J. and Heath, M. S.** (1971). Adaptation of the thermal responses of insects.  
652 *Am. Zool.* **11**, 147–158.
- 653 **Jørgensen, L. B., Malte, H. and Overgaard, J.** (2019). How to assess *Drosophila* heat tolerance: Unifying static and  
654 dynamic tolerance assays to predict heat distribution limits. *Funct. Ecol.* **33**, 629–642.
- 655 **Jutfelt, F., Roche, D. G., Clark, T. D., Norin, T., Binning, S. A., Speers-Roesch, B., Amcoff, M., Morgan, R.,  
656 Andreassen, A. H. and Sundin, J.** (2019). Brain cooling marginally increases acute upper thermal tolerance in  
657 Atlantic cod. *J. Exp. Biol.* **222**, jeb208249.
- 658 **Kellermann, V., Overgaard, J., Hoffmann, A. A., Flojgaard, C., Svenning, J.-C. and Loeschcke, V.** (2012). Upper  
659 thermal limits of *Drosophila* are linked to species distributions and strongly constrained phylogenetically. *Proc.*  
660 *Natl. Acad. Sci. U. S. A.* **109**, 16228–16233.
- 661 **Kimura, M. T.** (2004). Cold and heat tolerance of drosophilid flies with reference to their latitudinal distributions.  
662 *Oecologia* **140**, 442–449.
- 663 **Kingsolver, J. G. and Umbanhowar, J.** (2018). The analysis and interpretation of critical temperatures. *J. Exp. Biol.*

- 664           **221**, jeb167858.
- 665   **Klok, C. J.** (2004). Upper thermal tolerance and oxygen limitation in terrestrial arthropods. *J. Exp. Biol.* **207**, 2361–  
666           2370.
- 667   **Košťál, V., Vambera, J. and Bastl, J.** (2004). On the nature of pre-freeze mortality in insects: water balance, ion  
668           homeostasis and energy charge in the adults of *Pyrrhocoris apterus*. *J. Exp. Biol.* **207**, 1509–1521.
- 669   **Larsen, E. B.** (1943). Problems of heat death and heat injury. Experiments on some species of Diptera. *Kgl. Danske*  
670           *Vidensk Selsk. Biol. Medd.* **19**, 1–52.
- 671   **Lutterschmidt, W. I. and Hutchison, V. H.** (1997a). The critical thermal maximum: data to support the onset of  
672           spasms as the definitive end point. *Can. J. Zool.* **75**, 1553–1560.
- 673   **Lutterschmidt, W. I. and Hutchison, V. H.** (1997b). The critical thermal maximum: history and critique. *Can. J. Zool.*  
674           **75**, 1561–1574.
- 675   **MacMillan, H. A. and Hughson, B. N.** (2014). A high-throughput method of hemolymph extraction from adult  
676           *Drosophila* without anesthesia. *J. Insect Physiol.* **63**, 27–31.
- 677   **MacMillan, H. A. and Sinclair, B. J.** (2011). Mechanisms underlying insect chill-coma. *J. Insect Physiol.* **57**, 12–20.
- 678   **MacMillan, H. A., Nørgård, M., MacLean, H. J., Overgaard, J. and Williams, C. J. A.** (2017). A critical test of  
679           *Drosophila* anaesthetics: Isoflurane and sevoflurane are benign alternatives to cold and CO<sub>2</sub>. *J. Insect Physiol.*  
680           **101**, 97–106.
- 681   **Martinet, B., Lecocq, T., Smet, J. and Rasmont, P.** (2015). A Protocol to Assess Insect Resistance to Heat Waves,  
682           Applied to Bumblebees (*Bombus Latreille*, 1802). *PLoS One* **10**, e0118591.
- 683   **Mellanby, K.** (1954). Acclimatization and the thermal death point in insects. *Nature* **173**, 582.
- 684   **Mölich, A. B., Förster, T. D. and Lighton, J. R. B.** (2013). Hyperthermic Overdrive: Oxygen Delivery does Not Limit  
685           Thermal Tolerance in *Drosophila melanogaster*. *J. Insect Sci.* **12**, 1–7.
- 686   **Money, T. G. A., Rodgers, C. I., McGregor, S. M. K. and Robertson, R. M.** (2009). Loss of Potassium Homeostasis  
687           Underlies Hyperthermic Conduction Failure in Control and Preconditioned Locusts. *J. Neurophysiol.* **102**, 285–  
688           293.
- 689   **Montgomery, J. C. and Macdonald, J. a** (1990). Effects of temperature on nervous system: implications for  
690           behavioral performance. *Am. J. Physiol.* **259**, R191–6.
- 691   **Neven, L. G.** (2000). Physiological responses of insects to heat. *Postharvest Biol. Technol.* **21**, 103–111.
- 692   **O’Sullivan, J. D. B., MacMillan, H. A. and Overgaard, J.** (2017). Heat stress is associated with disruption of ion  
693           balance in the migratory locust, *Locusta migratoria*. *J. Therm. Biol.* **68**, 177–185.
- 694   **Overgaard, J. and MacMillan, H. A.** (2017). The Integrative Physiology of Insect Chill Tolerance. *Annu. Rev.*

- 695        *Physiol.* **79**, 187–208.
- 696    **Overgaard, J., Kearney, M. R. and Hoffmann, A. A.** (2014). Sensitivity to thermal extremes in Australian  
697        *Drosophila* implies similar impacts of climate change on the distribution of widespread and tropical species.  
698        *Glob. Chang. Biol.* **20**, 1738–1750.
- 699    **Pörtner, H.-O.** (2001). Climate change and temperature-dependent biogeography: oxygen limitation of thermal  
700        tolerance in animals. *Naturwissenschaften* **88**, 137–146.
- 701    **Prosser, C. L. and Nelson, D. O.** (1981). The role of nervous systems in temperature adaptation of poikilotherms.  
702        *Annu. Rev. Physiol.* **43**, 281–300.
- 703    **R Core Team** (2018). R: A language and environment for statistical computing.
- 704    **Robertson, R. M.** (2004). Thermal stress and neural function: Adaptive mechanisms in insect model systems. *J. Therm.*  
705        *Biol.* **29**, 351–358.
- 706    **Robertson, R. M., Dawson-Scully, K. D. and Andrew, R. D.** Neural shutdown under stress: an evolutionary  
707        perspective. (*Submitted*).
- 708    **Robertson, R. M., Spong, K. E. and Srithiphaphirom, P.** (2017). Chill coma in the locust, *Locusta migratoria*, is  
709        initiated by spreading depolarization in the central nervous system. *Sci. Rep.* **7**, 10297.
- 710    **Rodgers, C. I., Armstrong, G. A. B., Shoemaker, K. L., LaBrie, J. D., Moyes, C. D. and Robertson, R. M.** (2007).  
711        Stress preconditioning of spreading depression in the locust CNS. *PLoS One* **2**, e1366.
- 712    **Rodgers, C. I., Labrie, J. D. and Robertson, R. M.** (2009). K<sup>+</sup> homeostasis and central pattern generation in the  
713        metathoracic ganglion of the locust. *J. Insect Physiol.* **55**, 599–607.
- 714    **Rodgers, C. I., Armstrong, G. A. B. and Robertson, R. M.** (2010). Coma in response to environmental stress in the  
715        locust: a model for cortical spreading depression. *J. Insect Physiol.* **56**, 980–990.
- 716    **Rodríguez, E. C. and Robertson, R. M.** (2012). Protective effect of hypothermia on brain potassium homeostasis  
717        during repetitive anoxia in *Drosophila melanogaster*. *J. Exp. Biol.* **215**, 4157–4165.
- 718    **Sinclair, B. J., Vernon, P., Jaco Klok, C. and Chown, S. L.** (2003). Insects at low temperatures: an ecological  
719        perspective. *Trends Ecol. Evol.* **18**, 257–262.
- 720    **Somero, G. N.** (1995). Proteins and temperature. *Annu. Rev. Physiol.* **57**, 43–68.
- 721    **Spong, K. E., Rochon-Terry, G., Money, T. G. A. and Meldrum Robertson, R.** (2014). Disruption of the blood-  
722        brain barrier exacerbates spreading depression in the locust CNS. *J. Insect Physiol.* **66**, 1–9.
- 723    **Spong, K. E., Andrew, R. D. and Robertson, R. M.** (2016). Mechanisms of spreading depolarization in vertebrate and  
724        insect central nervous systems. *J. Neurophysiol.* **116**, 1117–1127.
- 725    **Stratman, R. and Markow, T. A.** (1998). Resistance to thermal stress in desert *Drosophila*. *Funct. Ecol.* **12**, 965–970.

- 726 **Sunday, J. M., Bates, A. E., Kearney, M. R., Colwell, R. K., Dulvy, N. K., Longino, J. T. and Huey, R. B.** (2014).  
727 Thermal-safety margins and the necessity of thermoregulatory behavior across latitude and elevation. *PNAS* **111**,  
728 5610–5615.
- 729 **Terblanche, J. S., Hoffmann, A. A., Mitchell, K. A., Rako, L., le Roux, P. C. and Chown, S. L.** (2011).  
730 Ecologically relevant measures of tolerance to potentially lethal temperatures. *J. Exp. Biol.* **214**, 3713–3725.
- 731 **Verberk, W. C. E. P., Overgaard, J., Ern, R., Bayley, M., Wang, T., Boardman, L. and Terblanche, J. S.** (2015).  
732 Does oxygen limit thermal tolerance in arthropods? A critical review of current evidence. *Comp. Biochem.*  
733 *Physiol. A. Mol. Integr. Physiol.*
- 734 **Vorhees, A. S., Gray, E. M. and Bradley, T. J.** (2013). Thermal Resistance and Performance Correlate with Climate  
735 in Populations of a Widespread Mosquito. *Physiol. Biochem. Zool.* **86**, 73–81.
- 736 **Wu, J. and Fisher, R. S.** (2000). Hyperthermic spreading depressions in the immature rat hippocampal slice. *J.*  
737 *Neurophysiol.* **84**, 1355–1360.
- 738 **Yi, S. X. and Lee, R. E.** (2004). *In vivo* and *in vitro* rapid cold-hardening protects cells from cold-shock injury in the  
739 flesh fly. *J. Comp. Physiol. B Biochem. Syst. Environ. Physiol.* **174**, 611–615.
- 740 **Zachariassen, K. E.** (1985). Physiology of cold tolerance in insects. *Physiol. Rev.* **65**, 799–832.
- 741
